# Supplementary material for: Discovery of Drug Synergies in Gastric Cancer Cells Predicted by Logical Modeling
Source: PLoS Comput Biol. 2015 Aug 28;11(8):e1004426. doi: 10.1371/journal.pcbi.1004426 (PMC4567168; doi:10.1371/journal.pcbi.1004426)
Supplement: S6 Table — References to publications describing 56 observations of signal transduction perturbation responses in AGS cells. (XLSX) [file pcbi.1004426.s010.xlsx]

## Sheet: Sheet1
Protein measured	State in control experiment	Perturbation	State upon perturbation	Technique	Perturbation	PMID	Reference
AKT	On	PI3K[OFF]	Off	IHC	Chemical LY294002	21245990	Liu J, Fu XQ, Zhou W, Yu HG, Yu JP, Luo HS. LY294002 potentiates the anti-cancer effect of oxaliplatin for gastric cancer via death receptor pathway. World J Gastroenterol 2011;17:181-90. doi: 10.3748/wjg.v17.i2.181.
AKT	On	PI3K[OFF]	Off	Western blot	Chemical LY294002	21245990	Liu J, Fu XQ, Zhou W, Yu HG, Yu JP, Luo HS. LY294002 potentiates the anti-cancer effect of oxaliplatin for gastric cancer via death receptor pathway. World J Gastroenterol 2011;17:181-90. doi: 10.3748/wjg.v17.i2.181.
AKT	On	PI3K[OFF]	Off	Western blot	Chemical PI103	22336586	Bhattacharya B, Akram M, Balasubramanian I, et al. Pharmacologic synergy between dual phosphoinositide-3-kinase and mammalian target of rapamycin inhibition and 5-fluorouracil in PIK3CA mutant gastric cancer cells. Cancer Biol Ther 2012;13:34-42. doi: 10.4161/cbt.13.1.18437.
AKT	On	PI3K[OFF]	Off	Western blot	siRNA PI3K	23114914	Li R, Chen WC, Pang XQ, Tian WY, Wang WP, Zhang XG. Effect of PI3K gene silencing on growth, migration and related proteins expression of CD40 signal-mediated gastric cancer cells. Mol Biol Rep 2013;40:999-1008. doi: 10.1007/s11033-012-2141-7. Epub 2012
AKT	On	PI3K[OFF]+mTORC1[OFF]+mTORC2[OFF]	Off	Western blot	Chemical	22543857	Mueller A, Bachmann E, Linnig M, et al. Selective PI3K inhibition by BKM120 and BEZ235 alone or in combination with chemotherapy in wild-type and mutated human gastrointestinal cancer cell lines. Cancer Chemother Pharmacol 2012;69:1601-15. doi:
AKT	On	PTEN[ON]	Off	Western blot	Active plasmid PTEN	22325465	Tseng PC, Huang WC, Chen CL, et al. Regulation of SHP2 by PTEN/AKT/GSK-3beta signaling facilitates IFN-gamma resistance in hyperproliferating gastric cancer. Immunobiology 2012;217:926-34. doi: 10.1016/j.imbio.2012.01.001. Epub
AKT	Off	MEK[OFF]	On	Western blot	Chemical AZD6255	19755509	Yoon YK, Kim HP, Han SW, et al. Combination of EGFR and MEK1/2 inhibitor shows synergistic effects by suppressing EGFR/HER3-dependent AKT activation in human gastric cancer cells. Mol Cancer Ther 2009;8:2526-36. doi: 10.1158/1535-7163.MCT-09-0300. Epub
Apoptosis	Off	MEK1[OFF]	Off	Flow cytometry	Chemical PD98059	12540563	Choi IJ, Kim JS, Kim JM, Jung HC, Song IS. Effect of inhibition of extracellular signal-regulated kinase 1 and 2 pathway on apoptosis and bcl-2 expression in Helicobacter pylori-infected AGS cells. Infect Immun 2003;71:830-7.
Apoptosis	Off	p38[OFF]	Off	Flow cytometry	Chemical SB203580	12540563	Choi IJ, Kim JS, Kim JM, Jung HC, Song IS. Effect of inhibition of extracellular signal-regulated kinase 1 and 2 pathway on apoptosis and bcl-2 expression in Helicobacter pylori-infected AGS cells. Infect Immun 2003;71:830-7.
ASK1	Off	CyclinD1[OFF]	Off	Western blot	CCND1 overexpression + CCND1 sirna	21187402	Hayakawa Y, Hirata Y, Nakagawa H, et al. Apoptosis signal-regulating kinase 1 and cyclin D1 compose a positive feedback loop contributing to tumor growth in gastric cancer. Proc Natl Acad Sci U S A 2011;108:780-5. doi: 10.1073/pnas.1011418108.
Bax	Off	AKT1[OFF]	On	Western blot	AKT1 siRNA	18389626	Li X, Fan R, Zou X, et al. [Reversal of multidrug resistance of gastric cancer cells by down-regulation of CIAPIN1 with CIAPIN1 siRNA]. Mol Biol (Mosk) 2008;42:102-9.
BCL-2	On	AKT1[OFF]	Off	Western blot	AKT1 siRNA	18389626	Li X, Fan R, Zou X, et al. [Reversal of multidrug resistance of gastric cancer cells by down-regulation of CIAPIN1 with CIAPIN1 siRNA]. Mol Biol (Mosk) 2008;42:102-9.
Caspase3	Off	AKT[OFF] + deoxycholate	On	Western blot	siRNA AKT	20585984	Redlak MJ, Miller TA. Targeting PI3K/Akt/HSP90 signaling sensitizes gastric cancer cells to deoxycholate-induced apoptosis. Dig Dis Sci 2011;56:323-9. doi: 10.1007/s10620-010-1294-2. Epub 2010 Jun
Caspase8	Off	p38[OFF]	Off	Western blot	Chemical SB203580	22961809	Chun J, Joo EJ, Kang M, Kim YS. Platycodin D induces anoikis and caspase-mediated apoptosis via p38 MAPK in AGS human gastric cancer cells. J Cell Biochem 2013;114:456-70. doi: 10.1002/jcb.24386.
c-FLIPs	On	PI3K[OFF]	Off	IHC	Chemical LY294002	21245990	Liu J, Fu XQ, Zhou W, Yu HG, Yu JP, Luo HS. LY294002 potentiates the anti-cancer effect of oxaliplatin for gastric cancer via death receptor pathway. World J Gastroenterol 2011;17:181-90. doi: 10.3748/wjg.v17.i2.181.
cMYC	On	TCF4[OFF]	Off	PCR	Plasmid DNTCF4	21042278	Asciutti S, Akiri G, Grumolato L, Vijayakumar S, Aaronson SA. Diverse mechanisms of Wnt activation and effects of pathway inhibition on proliferation of human gastric carcinoma cells. Oncogene 2011;30:956-66. doi: 10.1038/onc.2010.475. Epub 2010 Nov 1.
ERK	Off	ASK1[ON]	On	Western blot	Active plasmid ASK1 + ASK1 sirna	21187402	Hayakawa Y, Hirata Y, Nakagawa H, et al. Apoptosis signal-regulating kinase 1 and cyclin D1 compose a positive feedback loop contributing to tumor growth in gastric cancer. Proc Natl Acad Sci U S A 2011;108:780-5. doi: 10.1073/pnas.1011418108.
ERK1	Off	EGFR[ON]	On	Western blot, luciferase activity	EGF	19020743	Baek MK, Kim MH, Jang HJ, et al. EGF stimulates uPAR expression and cell invasiveness through ERK, AP-1, and NF-kappaB signaling in human gastric carcinoma cells. Oncol Rep 2008;20:1569-75.
ERK1	Off	JNK[OFF]	On	Western blot	Chemical SP600125	18702686	Ding SZ, Smith MF Jr, Goldberg JB. Helicobacter pylori and mitogen-activated protein kinases regulate the cell cycle, proliferation and apoptosis in gastric epithelial cells. J Gastroenterol Hepatol 2008;23:
ERK1	Off	p38[OFF]	On	Western blot	Chemical SB202190	18702686	Ding SZ, Smith MF Jr, Goldberg JB. Helicobacter pylori and mitogen-activated protein kinases regulate the cell cycle, proliferation and apoptosis in gastric epithelial cells. J Gastroenterol Hepatol 2008;23:
ERK1/2	Off	CyclinD1[OFF]	On	Western blot	CCND1 overexpression + CCND1 sirna	21187402	Hayakawa Y, Hirata Y, Nakagawa H, et al. Apoptosis signal-regulating kinase 1 and cyclin D1 compose a positive feedback loop contributing to tumor growth in gastric cancer. Proc Natl Acad Sci U S A 2011;108:780-5. doi: 10.1073/pnas.1011418108.
ERK1/2	Off	EGFR[ON]	On	Western blot	EGF	20364107	Huang Y, Zhu Z, Sun M, et al. Critical role of aquaporin-3 in the human epidermal growth factor-induced migration and proliferation in the human gastric adenocarcinoma cells. Cancer Biol Ther 2010;9:1000-7. Epub 2010 Jun 7.
ERK1/2	Off	EGFR[ON]+MEK1[OFF]	Off	Western blot	Chemical U0126	20364107	Huang Y, Zhu Z, Sun M, et al. Critical role of aquaporin-3 in the human epidermal growth factor-induced migration and proliferation in the human gastric adenocarcinoma cells. Cancer Biol Ther 2010;9:1000-7. Epub 2010 Jun 7.
ERK1/2	On	SHP2[OFF]	Off?	Western blot	Plasmid shSHP2	22325465	Tseng PC, Huang WC, Chen CL, et al. Regulation of SHP2 by PTEN/AKT/GSK-3beta signaling facilitates IFN-gamma resistance in hyperproliferating gastric cancer. Immunobiology 2012;217:926-34. doi: 10.1016/j.imbio.2012.01.001. Epub
ERK2	Off	EGFR[ON]	On	Western blot, luciferase activity	EGF	19020743	Baek MK, Kim MH, Jang HJ, et al. EGF stimulates uPAR expression and cell invasiveness through ERK, AP-1, and NF-kappaB signaling in human gastric carcinoma cells. Oncol Rep 2008;20:1569-75.
ERK2	Off	JNK[OFF]	On	Western blot	Chemical SP600125	18702686	Ding SZ, Smith MF Jr, Goldberg JB. Helicobacter pylori and mitogen-activated protein kinases regulate the cell cycle, proliferation and apoptosis in gastric epithelial cells. J Gastroenterol Hepatol 2008;23:
ERK2	Off	p38[OFF]	On	Western blot	Chemical SB202190	18702686	Ding SZ, Smith MF Jr, Goldberg JB. Helicobacter pylori and mitogen-activated protein kinases regulate the cell cycle, proliferation and apoptosis in gastric epithelial cells. J Gastroenterol Hepatol 2008;23:
GSK3-beta	Off	MEK[OFF]	Off	Western blot	Chemical U0126	22325465	Tseng PC, Huang WC, Chen CL, et al. Regulation of SHP2 by PTEN/AKT/GSK-3beta signaling facilitates IFN-gamma resistance in hyperproliferating gastric cancer. Immunobiology 2012;217:926-34. doi: 10.1016/j.imbio.2012.01.001. Epub
GSK3-beta	Off	MEK[OFF]	Off	Western blot	Chemical PD98059	22325465	Tseng PC, Huang WC, Chen CL, et al. Regulation of SHP2 by PTEN/AKT/GSK-3beta signaling facilitates IFN-gamma resistance in hyperproliferating gastric cancer. Immunobiology 2012;217:926-34. doi: 10.1016/j.imbio.2012.01.001. Epub
GSK3-beta	Off	PI3K[OFF]	On	Western blot	Chemical LY294002	22325465	Tseng PC, Huang WC, Chen CL, et al. Regulation of SHP2 by PTEN/AKT/GSK-3beta signaling facilitates IFN-gamma resistance in hyperproliferating gastric cancer. Immunobiology 2012;217:926-34. doi: 10.1016/j.imbio.2012.01.001. Epub
GSK3-beta	Off	PTEN[ON]	On	Western blot	Active plasmid PTEN	22325465	Tseng PC, Huang WC, Chen CL, et al. Regulation of SHP2 by PTEN/AKT/GSK-3beta signaling facilitates IFN-gamma resistance in hyperproliferating gastric cancer. Immunobiology 2012;217:926-34. doi: 10.1016/j.imbio.2012.01.001. Epub
JNK	Off	ASK1[ON]	On	Western blot	Active plasmid ASK1 + ASK1 sirna	21187402	Hayakawa Y, Hirata Y, Nakagawa H, et al. Apoptosis signal-regulating kinase 1 and cyclin D1 compose a positive feedback loop contributing to tumor growth in gastric cancer. Proc Natl Acad Sci U S A 2011;108:780-5. doi: 10.1073/pnas.1011418108.
JNK	Off	p38[OFF]	Off	Western blot	Chemical SB202190	18702686	Ding SZ, Smith MF Jr, Goldberg JB. Helicobacter pylori and mitogen-activated protein kinases regulate the cell cycle, proliferation and apoptosis in gastric epithelial cells. J Gastroenterol Hepatol 2008;23:
JNK	On?	p38[OFF]	Off	Western blot	Chemical SB203580	22961809	Chun J, Joo EJ, Kang M, Kim YS. Platycodin D induces anoikis and caspase-mediated apoptosis via p38 MAPK in AGS human gastric cancer cells. J Cell Biochem 2013;114:456-70. doi: 10.1002/jcb.24386.
JNK1	On	EGFR[ON]	Off	Western blot, luciferase activity	EGF	19020743	Baek MK, Kim MH, Jang HJ, et al. EGF stimulates uPAR expression and cell invasiveness through ERK, AP-1, and NF-kappaB signaling in human gastric carcinoma cells. Oncol Rep 2008;20:1569-75.
JNK2	On	EGFR[ON]	Off	Western blot, luciferase activity	EGF	19020743	Baek MK, Kim MH, Jang HJ, et al. EGF stimulates uPAR expression and cell invasiveness through ERK, AP-1, and NF-kappaB signaling in human gastric carcinoma cells. Oncol Rep 2008;20:1569-75.
Jun	Off	JNK[OFF]	Off	Western blot	Chemical + GF	20150185	Mishra P, Senthivinayagam S, Rangasamy V, Sondarva G, Rana B. Mixed lineage kinase-3/JNK1 axis promotes migration of human gastric cancer cells following gastrin stimulation. Mol Endocrinol 2010;24:598-607. doi: 10.1210/me.2009-0387. Epub 2010 Feb
MMP-1	Off	EGFR[ON]	On	Western blot	GF	17656145	Ancha HR, Kurella RR, Stewart CA, Damera G, Ceresa BP, Harty RF. Histamine stimulation of MMP-1(collagenase-1) secretion and gene expression in gastric epithelial cells: role of EGFR transactivation and the MAP kinase pathway. Int J Biochem Cell Biol 2007;39:2143-52. Epub 2007 Jun 24.
MMP-2	Off	Ras[ON]	On	Western blot	Plasmid Ras	20840540	Lin HH, Chen JH, Chou FP, Wang CJ. Protocatechuic acid inhibits cancer cell metastasis involving the down-regulation of Ras/Akt/NF-kappaB pathway and MMP-2 production by targeting RhoB activation. Br J Pharmacol 2011;162:237-54. doi: 10.1111/j.1476-5381.2010.01022.x.
NFkB	Off	EGFR[ON]	On	EMSA	EGF	19020743	Baek MK, Kim MH, Jang HJ, et al. EGF stimulates uPAR expression and cell invasiveness through ERK, AP-1, and NF-kappaB signaling in human gastric carcinoma cells. Oncol Rep 2008;20:1569-75.
p38	Off	ASK1[ON]	On	Western blot	Active plasmid ASK1 + ASK1 sirna	21187402	Hayakawa Y, Hirata Y, Nakagawa H, et al. Apoptosis signal-regulating kinase 1 and cyclin D1 compose a positive feedback loop contributing to tumor growth in gastric cancer. Proc Natl Acad Sci U S A 2011;108:780-5. doi: 10.1073/pnas.1011418108.
p38	Off	EGFR[ON]	On	Western blot, luciferase activity	EGF	19020743	Baek MK, Kim MH, Jang HJ, et al. EGF stimulates uPAR expression and cell invasiveness through ERK, AP-1, and NF-kappaB signaling in human gastric carcinoma cells. Oncol Rep 2008;20:1569-75.
p38	Off	JNK[OFF]	Off	Western blot	Chemical PD98059	18702686	Ding SZ, Smith MF Jr, Goldberg JB. Helicobacter pylori and mitogen-activated protein kinases regulate the cell cycle, proliferation and apoptosis in gastric epithelial cells. J Gastroenterol Hepatol 2008;23:
p38	Off	JNK[OFF]	On?	Western blot	Chemical SP600125	18702686	Ding SZ, Smith MF Jr, Goldberg JB. Helicobacter pylori and mitogen-activated protein kinases regulate the cell cycle, proliferation and apoptosis in gastric epithelial cells. J Gastroenterol Hepatol 2008;23:
p38	On?	JNK[OFF]	Off	Western blot	Chemical SP600125	22961809	Chun J, Joo EJ, Kang M, Kim YS. Platycodin D induces anoikis and caspase-mediated apoptosis via p38 MAPK in AGS human gastric cancer cells. J Cell Biochem 2013;114:456-70. doi: 10.1002/jcb.24386.
PDK1	On	PTEN[ON]	Off	Western blot	Active plasmid PTEN	22325465	Tseng PC, Huang WC, Chen CL, et al. Regulation of SHP2 by PTEN/AKT/GSK-3beta signaling facilitates IFN-gamma resistance in hyperproliferating gastric cancer. Immunobiology 2012;217:926-34. doi: 10.1016/j.imbio.2012.01.001. Epub
Proliferation	On	EGFR[OFF]	On	XTT cell proliferation assay	Chemical Cetuximab	22290393	Heindl S, Eggenstein E, Keller S, et al. Relevance of MET activation and genetic alterations of KRAS and E-cadherin for cetuximab sensitivity of gastric cancer cell lines. J Cancer Res Clin Oncol 2012;0:
Proliferation	On	PI3K[OFF]	Off	Western blot	Chemical PI103	22336586	Bhattacharya B, Akram M, Balasubramanian I, et al. Pharmacologic synergy between dual phosphoinositide-3-kinase and mammalian target of rapamycin inhibition and 5-fluorouracil in PIK3CA mutant gastric cancer cells. Cancer Biol Ther 2012;13:34-42. doi: 10.4161/cbt.13.1.18437.
PTEN	?	AKT1[OFF]	?	Western blot	AKT1 siRNA	18389626	Li X, Fan R, Zou X, et al. [Reversal of multidrug resistance of gastric cancer cells by down-regulation of CIAPIN1 with CIAPIN1 siRNA]. Mol Biol (Mosk) 2008;42:102-9.
S6K	On	mTORC2[OFF]	Off	Western blot	Chemical Rapamycin	12433206	Kwon HK, Bae GU, Yoon JW, et al. Constitutive activation of p70S6k in cancer cells. Arch Pharm Res 2002;25:685-90.
S6K	On	PI3K[OFF]	Off (slightly reduced)	Western blot	Chemical Wortmannin	12433206	Kwon HK, Bae GU, Yoon JW, et al. Constitutive activation of p70S6k in cancer cells. Arch Pharm Res 2002;25:685-90.
S6K	On	PI3K[OFF]	Off	Western blot	Chemical PI103	22336586	Bhattacharya B, Akram M, Balasubramanian I, et al. Pharmacologic synergy between dual phosphoinositide-3-kinase and mammalian target of rapamycin inhibition and 5-fluorouracil in PIK3CA mutant gastric cancer cells. Cancer Biol Ther 2012;13:34-42. doi: 10.4161/cbt.13.1.18437.
S6K	On	PI3K[OFF]+mTORC1[OFF]+mTORC2[OFF]	Off	Western blot	Chemical	22543857	Mueller A, Bachmann E, Linnig M, et al. Selective PI3K inhibition by BKM120 and BEZ235 alone or in combination with chemotherapy in wild-type and mutated human gastrointestinal cancer cell lines. Cancer Chemother Pharmacol 2012;69:1601-15. doi:
SHP2	On	GSK3[ON]	Off	Western blot	Active plasmid GSK-3B-S9A-GFP	22325465	Tseng PC, Huang WC, Chen CL, et al. Regulation of SHP2 by PTEN/AKT/GSK-3beta signaling facilitates IFN-gamma resistance in hyperproliferating gastric cancer. Immunobiology 2012;217:926-34. doi: 10.1016/j.imbio.2012.01.001. Epub
SHP2	On	PTEN[ON]	Off	Western blot	Active plasmid PTEN	22325465	Tseng PC, Huang WC, Chen CL, et al. Regulation of SHP2 by PTEN/AKT/GSK-3beta signaling facilitates IFN-gamma resistance in hyperproliferating gastric cancer. Immunobiology 2012;217:926-34. doi: 10.1016/j.imbio.2012.01.001. Epub
TAK1	On	CyclinD1[OFF]	On	Western blot	CCND1 overexpression + CCND1 sirna	21187402	Hayakawa Y, Hirata Y, Nakagawa H, et al. Apoptosis signal-regulating kinase 1 and cyclin D1 compose a positive feedback loop contributing to tumor growth in gastric cancer. Proc Natl Acad Sci U S A 2011;108:780-5. doi: 10.1073/pnas.1011418108.
