# Supplementary material for: Discovery of Drug Synergies in Gastric Cancer Cells Predicted by Logical Modeling
Source: PLoS Comput Biol. 2015 Aug 28;11(8):e1004426. doi: 10.1371/journal.pcbi.1004426 (PMC4567168; doi:10.1371/journal.pcbi.1004426)
Supplement: S7 Table — (XLSX) [file pcbi.1004426.s011.xlsx]

## Sheet: Summary
Computed interaction functionality of reduced model
Summary
Source	Target	Sign
ERK	p38alpha	negative
p38alpha	p38alpha	negative
betacatenin	Prosurvival	positive
PI3K	Prosurvival	positive
ERK	Prosurvival	positive
TAK1	Prosurvival	negative
GSK3	Prosurvival	positive
MEK	ERK	positive
ERK	ERK	negative
AKT	ERK	negative
betacatenin	Antisurvival	positive
PI3K	Antisurvival	positive
ERK	Antisurvival	negative
p38alpha	Antisurvival	dual
TAK1	Antisurvival	negative
AKT	Antisurvival	negative
GSK3	Antisurvival	positive
betacatenin	AKT	positive
PI3K	AKT	positive
ERK	AKT	negative
TAK1	AKT	negative
AKT	AKT	negative
GSK3	AKT	positive
betacatenin	PI3K	positive
ERK	PI3K	negative
TAK1	PI3K	negative
GSK3	PI3K	positive
p38alpha	TAK1	negative
betacatenin	MEK	positive
ERK	MEK	negative
p38alpha	MEK	negative
TAK1	MEK	negative
AKT	MEK	negative
GSK3	MEK	positive
Details
Target node: p38alpha
ERK -> p38alpha is negative	Context
Sign	Source level	Target level	p38alpha
-	0/1	1/0	0
=	0/1	0/0	1
p38alpha -> p38alpha is negative	Context
Sign	Source level	Target level	ERK
-	0/1	1/0	0
=	0/1	0/0	1
Target node: Prosurvival
betacatenin -> Prosurvival is positive	Context
Sign	Source level	Target level	ERK	TAK1	PI3K	GSK3
=	0/1	2/2	0	0	0	0
=	0/1	2/2	0	0	0	1
=	0/1	2/2	0	0	1	0
=	0/1	2/2	0	0	1	1
+	0/1	0/2	0	1	0	0
+	0/1	0/2	0	1	0	1
+	0/1	0/2	0	1	1	0
+	0/1	0/2	0	1	1	1
=	0/1	2/2	1	0	0	0
=	0/1	2/2	1	0	0	1
=	0/1	3/3	1	0	1	0
=	0/1	3/3	1	0	1	1
+	0/1	0/2	1	1	0	0
+	0/1	0/2	1	1	0	1
+	0/1	0/3	1	1	1	0
+	0/1	1/3	1	1	1	1
PI3K -> Prosurvival is positive	Context
Sign	Source level	Target level	ERK	TAK1	GSK3	betacatenin
=	0/1	2/2	0	0	0	0
=	0/1	2/2	0	0	0	1
=	0/1	2/2	0	0	1	0
=	0/1	2/2	0	0	1	1
=	0/1	0/0	0	1	0	0
=	0/1	2/2	0	1	0	1
=	0/1	0/0	0	1	1	0
=	0/1	2/2	0	1	1	1
+	0/1	2/3	1	0	0	0
+	0/1	2/3	1	0	0	1
+	0/1	2/3	1	0	1	0
+	0/1	2/3	1	0	1	1
=	0/1	0/0	1	1	0	0
+	0/1	2/3	1	1	0	1
+	0/1	0/1	1	1	1	0
+	0/1	2/3	1	1	1	1
ERK -> Prosurvival is positive	Context
Sign	Source level	Target level	TAK1	PI3K	GSK3	betacatenin
=	0/1	2/2	0	0	0	0
=	0/1	2/2	0	0	0	1
=	0/1	2/2	0	0	1	0
=	0/1	2/2	0	0	1	1
+	0/1	2/3	0	1	0	0
+	0/1	2/3	0	1	0	1
+	0/1	2/3	0	1	1	0
+	0/1	2/3	0	1	1	1
=	0/1	0/0	1	0	0	0
=	0/1	2/2	1	0	0	1
=	0/1	0/0	1	0	1	0
=	0/1	2/2	1	0	1	1
=	0/1	0/0	1	1	0	0
+	0/1	2/3	1	1	0	1
+	0/1	0/1	1	1	1	0
+	0/1	2/3	1	1	1	1
TAK1 -> Prosurvival is negative	Context
Sign	Source level	Target level	ERK	PI3K	GSK3	betacatenin
-	0/1	2/0	0	0	0	0
=	0/1	2/2	0	0	0	1
-	0/1	2/0	0	0	1	0
=	0/1	2/2	0	0	1	1
-	0/1	2/0	0	1	0	0
=	0/1	2/2	0	1	0	1
-	0/1	2/0	0	1	1	0
=	0/1	2/2	0	1	1	1
-	0/1	2/0	1	0	0	0
=	0/1	2/2	1	0	0	1
-	0/1	2/0	1	0	1	0
=	0/1	2/2	1	0	1	1
-	0/1	3/0	1	1	0	0
=	0/1	3/3	1	1	0	1
-	0/1	3/1	1	1	1	0
=	0/1	3/3	1	1	1	1
GSK3 -> Prosurvival is positive	Context
Sign	Source level	Target level	ERK	TAK1	PI3K	betacatenin
=	0/1	2/2	0	0	0	0
=	0/1	2/2	0	0	0	1
=	0/1	2/2	0	0	1	0
=	0/1	2/2	0	0	1	1
=	0/1	0/0	0	1	0	0
=	0/1	2/2	0	1	0	1
=	0/1	0/0	0	1	1	0
=	0/1	2/2	0	1	1	1
=	0/1	2/2	1	0	0	0
=	0/1	2/2	1	0	0	1
=	0/1	3/3	1	0	1	0
=	0/1	3/3	1	0	1	1
=	0/1	0/0	1	1	0	0
=	0/1	2/2	1	1	0	1
+	0/1	0/1	1	1	1	0
=	0/1	3/3	1	1	1	1
Target node: ERK
MEK -> ERK is positive	Context
Sign	Source level	Target level	ERK	AKT
=	0/1	1/1	0	0
+	0/1	0/1	0	1
+	0/1	0/1	1	0
+	0/1	0/1	1	1
ERK -> ERK is negative	Context
Sign	Source level	Target level	MEK	AKT
-	0/1	1/0	0	0
=	0/1	0/0	0	1
=	0/1	1/1	1	0
=	0/1	1/1	1	1
AKT -> ERK is negative	Context
Sign	Source level	Target level	MEK	ERK
-	0/1	1/0	0	0
=	0/1	0/0	0	1
=	0/1	1/1	1	0
=	0/1	1/1	1	1
Target node: Antisurvival
betacatenin -> Antisurvival is positive	Context
Sign	Source level	Target level	ERK	TAK1	p38alpha	AKT	PI3K	GSK3
=	0/1	2/2	0	0	0	0	0	0
=	0/1	2/2	0	0	0	0	0	1
=	0/1	2/2	0	0	0	0	1	0
=	0/1	2/2	0	0	0	0	1	1
=	0/1	1/1	0	0	0	1	0	0
=	0/1	1/1	0	0	0	1	0	1
=	0/1	1/1	0	0	0	1	1	0
=	0/1	1/1	0	0	0	1	1	1
=	0/1	2/2	0	0	1	0	0	0
=	0/1	2/2	0	0	1	0	0	1
=	0/1	3/3	0	0	1	0	1	0
=	0/1	3/3	0	0	1	0	1	1
=	0/1	0/0	0	0	1	1	0	0
=	0/1	0/0	0	0	1	1	0	1
=	0/1	0/0	0	0	1	1	1	0
=	0/1	0/0	0	0	1	1	1	1
=	0/1	1/1	0	1	0	0	0	0
=	0/1	1/1	0	1	0	0	0	1
=	0/1	1/1	0	1	0	0	1	0
=	0/1	1/1	0	1	0	0	1	1
=	0/1	1/1	0	1	0	1	0	0
=	0/1	1/1	0	1	0	1	0	1
=	0/1	1/1	0	1	0	1	1	0
=	0/1	1/1	0	1	0	1	1	1
=	0/1	1/1	0	1	1	0	0	0
=	0/1	1/1	0	1	1	0	0	1
+	0/1	1/2	0	1	1	0	1	0
=	0/1	2/2	0	1	1	0	1	1
=	0/1	0/0	0	1	1	1	0	0
=	0/1	0/0	0	1	1	1	0	1
=	0/1	0/0	0	1	1	1	1	0
=	0/1	0/0	0	1	1	1	1	1
=	0/1	2/2	1	0	0	0	0	0
=	0/1	2/2	1	0	0	0	0	1
=	0/1	2/2	1	0	0	0	1	0
=	0/1	2/2	1	0	0	0	1	1
=	0/1	0/0	1	0	0	1	0	0
=	0/1	0/0	1	0	0	1	0	1
=	0/1	0/0	1	0	0	1	1	0
=	0/1	0/0	1	0	0	1	1	1
=	0/1	2/2	1	0	1	0	0	0
=	0/1	2/2	1	0	1	0	0	1
=	0/1	2/2	1	0	1	0	1	0
=	0/1	2/2	1	0	1	0	1	1
=	0/1	0/0	1	0	1	1	0	0
=	0/1	0/0	1	0	1	1	0	1
=	0/1	0/0	1	0	1	1	1	0
=	0/1	0/0	1	0	1	1	1	1
=	0/1	1/1	1	1	0	0	0	0
=	0/1	1/1	1	1	0	0	0	1
=	0/1	1/1	1	1	0	0	1	0
=	0/1	1/1	1	1	0	0	1	1
=	0/1	0/0	1	1	0	1	0	0
=	0/1	0/0	1	1	0	1	0	1
=	0/1	0/0	1	1	0	1	1	0
=	0/1	0/0	1	1	0	1	1	1
=	0/1	1/1	1	1	1	0	0	0
=	0/1	1/1	1	1	1	0	0	1
=	0/1	1/1	1	1	1	0	1	0
=	0/1	1/1	1	1	1	0	1	1
=	0/1	0/0	1	1	1	1	0	0
=	0/1	0/0	1	1	1	1	0	1
=	0/1	0/0	1	1	1	1	1	0
=	0/1	0/0	1	1	1	1	1	1
PI3K -> Antisurvival is positive	Context
Sign	Source level	Target level	ERK	TAK1	p38alpha	AKT	GSK3	betacatenin
=	0/1	2/2	0	0	0	0	0	0
=	0/1	2/2	0	0	0	0	0	1
=	0/1	2/2	0	0	0	0	1	0
=	0/1	2/2	0	0	0	0	1	1
=	0/1	1/1	0	0	0	1	0	0
=	0/1	1/1	0	0	0	1	0	1
=	0/1	1/1	0	0	0	1	1	0
=	0/1	1/1	0	0	0	1	1	1
+	0/1	2/3	0	0	1	0	0	0
+	0/1	2/3	0	0	1	0	0	1
+	0/1	2/3	0	0	1	0	1	0
+	0/1	2/3	0	0	1	0	1	1
=	0/1	0/0	0	0	1	1	0	0
=	0/1	0/0	0	0	1	1	0	1
=	0/1	0/0	0	0	1	1	1	0
=	0/1	0/0	0	0	1	1	1	1
=	0/1	1/1	0	1	0	0	0	0
=	0/1	1/1	0	1	0	0	0	1
=	0/1	1/1	0	1	0	0	1	0
=	0/1	1/1	0	1	0	0	1	1
=	0/1	1/1	0	1	0	1	0	0
=	0/1	1/1	0	1	0	1	0	1
=	0/1	1/1	0	1	0	1	1	0
=	0/1	1/1	0	1	0	1	1	1
=	0/1	1/1	0	1	1	0	0	0
+	0/1	1/2	0	1	1	0	0	1
+	0/1	1/2	0	1	1	0	1	0
+	0/1	1/2	0	1	1	0	1	1
=	0/1	0/0	0	1	1	1	0	0
=	0/1	0/0	0	1	1	1	0	1
=	0/1	0/0	0	1	1	1	1	0
=	0/1	0/0	0	1	1	1	1	1
=	0/1	2/2	1	0	0	0	0	0
=	0/1	2/2	1	0	0	0	0	1
=	0/1	2/2	1	0	0	0	1	0
=	0/1	2/2	1	0	0	0	1	1
=	0/1	0/0	1	0	0	1	0	0
=	0/1	0/0	1	0	0	1	0	1
=	0/1	0/0	1	0	0	1	1	0
=	0/1	0/0	1	0	0	1	1	1
=	0/1	2/2	1	0	1	0	0	0
=	0/1	2/2	1	0	1	0	0	1
=	0/1	2/2	1	0	1	0	1	0
=	0/1	2/2	1	0	1	0	1	1
=	0/1	0/0	1	0	1	1	0	0
=	0/1	0/0	1	0	1	1	0	1
=	0/1	0/0	1	0	1	1	1	0
=	0/1	0/0	1	0	1	1	1	1
=	0/1	1/1	1	1	0	0	0	0
=	0/1	1/1	1	1	0	0	0	1
=	0/1	1/1	1	1	0	0	1	0
=	0/1	1/1	1	1	0	0	1	1
=	0/1	0/0	1	1	0	1	0	0
=	0/1	0/0	1	1	0	1	0	1
=	0/1	0/0	1	1	0	1	1	0
=	0/1	0/0	1	1	0	1	1	1
=	0/1	1/1	1	1	1	0	0	0
=	0/1	1/1	1	1	1	0	0	1
=	0/1	1/1	1	1	1	0	1	0
=	0/1	1/1	1	1	1	0	1	1
=	0/1	0/0	1	1	1	1	0	0
=	0/1	0/0	1	1	1	1	0	1
=	0/1	0/0	1	1	1	1	1	0
=	0/1	0/0	1	1	1	1	1	1
ERK -> Antisurvival is negative	Context
Sign	Source level	Target level	TAK1	p38alpha	AKT	PI3K	GSK3	betacatenin
=	0/1	2/2	0	0	0	0	0	0
=	0/1	2/2	0	0	0	0	0	1
=	0/1	2/2	0	0	0	0	1	0
=	0/1	2/2	0	0	0	0	1	1
=	0/1	2/2	0	0	0	1	0	0
=	0/1	2/2	0	0	0	1	0	1
=	0/1	2/2	0	0	0	1	1	0
=	0/1	2/2	0	0	0	1	1	1
-	0/1	1/0	0	0	1	0	0	0
-	0/1	1/0	0	0	1	0	0	1
-	0/1	1/0	0	0	1	0	1	0
-	0/1	1/0	0	0	1	0	1	1
-	0/1	1/0	0	0	1	1	0	0
-	0/1	1/0	0	0	1	1	0	1
-	0/1	1/0	0	0	1	1	1	0
-	0/1	1/0	0	0	1	1	1	1
=	0/1	2/2	0	1	0	0	0	0
=	0/1	2/2	0	1	0	0	0	1
=	0/1	2/2	0	1	0	0	1	0
=	0/1	2/2	0	1	0	0	1	1
-	0/1	3/2	0	1	0	1	0	0
-	0/1	3/2	0	1	0	1	0	1
-	0/1	3/2	0	1	0	1	1	0
-	0/1	3/2	0	1	0	1	1	1
=	0/1	0/0	0	1	1	0	0	0
=	0/1	0/0	0	1	1	0	0	1
=	0/1	0/0	0	1	1	0	1	0
=	0/1	0/0	0	1	1	0	1	1
=	0/1	0/0	0	1	1	1	0	0
=	0/1	0/0	0	1	1	1	0	1
=	0/1	0/0	0	1	1	1	1	0
=	0/1	0/0	0	1	1	1	1	1
=	0/1	1/1	1	0	0	0	0	0
=	0/1	1/1	1	0	0	0	0	1
=	0/1	1/1	1	0	0	0	1	0
=	0/1	1/1	1	0	0	0	1	1
=	0/1	1/1	1	0	0	1	0	0
=	0/1	1/1	1	0	0	1	0	1
=	0/1	1/1	1	0	0	1	1	0
=	0/1	1/1	1	0	0	1	1	1
-	0/1	1/0	1	0	1	0	0	0
-	0/1	1/0	1	0	1	0	0	1
-	0/1	1/0	1	0	1	0	1	0
-	0/1	1/0	1	0	1	0	1	1
-	0/1	1/0	1	0	1	1	0	0
-	0/1	1/0	1	0	1	1	0	1
-	0/1	1/0	1	0	1	1	1	0
-	0/1	1/0	1	0	1	1	1	1
=	0/1	1/1	1	1	0	0	0	0
=	0/1	1/1	1	1	0	0	0	1
=	0/1	1/1	1	1	0	0	1	0
=	0/1	1/1	1	1	0	0	1	1
=	0/1	1/1	1	1	0	1	0	0
-	0/1	2/1	1	1	0	1	0	1
-	0/1	2/1	1	1	0	1	1	0
-	0/1	2/1	1	1	0	1	1	1
=	0/1	0/0	1	1	1	0	0	0
=	0/1	0/0	1	1	1	0	0	1
=	0/1	0/0	1	1	1	0	1	0
=	0/1	0/0	1	1	1	0	1	1
=	0/1	0/0	1	1	1	1	0	0
=	0/1	0/0	1	1	1	1	0	1
=	0/1	0/0	1	1	1	1	1	0
=	0/1	0/0	1	1	1	1	1	1
p38alpha -> Antisurvival is dual	Context
Sign	Source level	Target level	ERK	TAK1	AKT	PI3K	GSK3	betacatenin
=	0/1	2/2	0	0	0	0	0	0
=	0/1	2/2	0	0	0	0	0	1
=	0/1	2/2	0	0	0	0	1	0
=	0/1	2/2	0	0	0	0	1	1
+	0/1	2/3	0	0	0	1	0	0
+	0/1	2/3	0	0	0	1	0	1
+	0/1	2/3	0	0	0	1	1	0
+	0/1	2/3	0	0	0	1	1	1
-	0/1	1/0	0	0	1	0	0	0
-	0/1	1/0	0	0	1	0	0	1
-	0/1	1/0	0	0	1	0	1	0
-	0/1	1/0	0	0	1	0	1	1
-	0/1	1/0	0	0	1	1	0	0
-	0/1	1/0	0	0	1	1	0	1
-	0/1	1/0	0	0	1	1	1	0
-	0/1	1/0	0	0	1	1	1	1
=	0/1	1/1	0	1	0	0	0	0
=	0/1	1/1	0	1	0	0	0	1
=	0/1	1/1	0	1	0	0	1	0
=	0/1	1/1	0	1	0	0	1	1
=	0/1	1/1	0	1	0	1	0	0
+	0/1	1/2	0	1	0	1	0	1
+	0/1	1/2	0	1	0	1	1	0
+	0/1	1/2	0	1	0	1	1	1
-	0/1	1/0	0	1	1	0	0	0
-	0/1	1/0	0	1	1	0	0	1
-	0/1	1/0	0	1	1	0	1	0
-	0/1	1/0	0	1	1	0	1	1
-	0/1	1/0	0	1	1	1	0	0
-	0/1	1/0	0	1	1	1	0	1
-	0/1	1/0	0	1	1	1	1	0
-	0/1	1/0	0	1	1	1	1	1
=	0/1	2/2	1	0	0	0	0	0
=	0/1	2/2	1	0	0	0	0	1
=	0/1	2/2	1	0	0	0	1	0
=	0/1	2/2	1	0	0	0	1	1
=	0/1	2/2	1	0	0	1	0	0
=	0/1	2/2	1	0	0	1	0	1
=	0/1	2/2	1	0	0	1	1	0
=	0/1	2/2	1	0	0	1	1	1
=	0/1	0/0	1	0	1	0	0	0
=	0/1	0/0	1	0	1	0	0	1
=	0/1	0/0	1	0	1	0	1	0
=	0/1	0/0	1	0	1	0	1	1
=	0/1	0/0	1	0	1	1	0	0
=	0/1	0/0	1	0	1	1	0	1
=	0/1	0/0	1	0	1	1	1	0
=	0/1	0/0	1	0	1	1	1	1
=	0/1	1/1	1	1	0	0	0	0
=	0/1	1/1	1	1	0	0	0	1
=	0/1	1/1	1	1	0	0	1	0
=	0/1	1/1	1	1	0	0	1	1
=	0/1	1/1	1	1	0	1	0	0
=	0/1	1/1	1	1	0	1	0	1
=	0/1	1/1	1	1	0	1	1	0
=	0/1	1/1	1	1	0	1	1	1
=	0/1	0/0	1	1	1	0	0	0
=	0/1	0/0	1	1	1	0	0	1
=	0/1	0/0	1	1	1	0	1	0
=	0/1	0/0	1	1	1	0	1	1
=	0/1	0/0	1	1	1	1	0	0
=	0/1	0/0	1	1	1	1	0	1
=	0/1	0/0	1	1	1	1	1	0
=	0/1	0/0	1	1	1	1	1	1
TAK1 -> Antisurvival is negative	Context
Sign	Source level	Target level	ERK	p38alpha	AKT	PI3K	GSK3	betacatenin
-	0/1	2/1	0	0	0	0	0	0
-	0/1	2/1	0	0	0	0	0	1
-	0/1	2/1	0	0	0	0	1	0
-	0/1	2/1	0	0	0	0	1	1
-	0/1	2/1	0	0	0	1	0	0
-	0/1	2/1	0	0	0	1	0	1
-	0/1	2/1	0	0	0	1	1	0
-	0/1	2/1	0	0	0	1	1	1
=	0/1	1/1	0	0	1	0	0	0
=	0/1	1/1	0	0	1	0	0	1
=	0/1	1/1	0	0	1	0	1	0
=	0/1	1/1	0	0	1	0	1	1
=	0/1	1/1	0	0	1	1	0	0
=	0/1	1/1	0	0	1	1	0	1
=	0/1	1/1	0	0	1	1	1	0
=	0/1	1/1	0	0	1	1	1	1
-	0/1	2/1	0	1	0	0	0	0
-	0/1	2/1	0	1	0	0	0	1
-	0/1	2/1	0	1	0	0	1	0
-	0/1	2/1	0	1	0	0	1	1
-	0/1	3/1	0	1	0	1	0	0
-	0/1	3/2	0	1	0	1	0	1
-	0/1	3/2	0	1	0	1	1	0
-	0/1	3/2	0	1	0	1	1	1
=	0/1	0/0	0	1	1	0	0	0
=	0/1	0/0	0	1	1	0	0	1
=	0/1	0/0	0	1	1	0	1	0
=	0/1	0/0	0	1	1	0	1	1
=	0/1	0/0	0	1	1	1	0	0
=	0/1	0/0	0	1	1	1	0	1
=	0/1	0/0	0	1	1	1	1	0
=	0/1	0/0	0	1	1	1	1	1
-	0/1	2/1	1	0	0	0	0	0
-	0/1	2/1	1	0	0	0	0	1
-	0/1	2/1	1	0	0	0	1	0
-	0/1	2/1	1	0	0	0	1	1
-	0/1	2/1	1	0	0	1	0	0
-	0/1	2/1	1	0	0	1	0	1
-	0/1	2/1	1	0	0	1	1	0
-	0/1	2/1	1	0	0	1	1	1
=	0/1	0/0	1	0	1	0	0	0
=	0/1	0/0	1	0	1	0	0	1
=	0/1	0/0	1	0	1	0	1	0
=	0/1	0/0	1	0	1	0	1	1
=	0/1	0/0	1	0	1	1	0	0
=	0/1	0/0	1	0	1	1	0	1
=	0/1	0/0	1	0	1	1	1	0
=	0/1	0/0	1	0	1	1	1	1
-	0/1	2/1	1	1	0	0	0	0
-	0/1	2/1	1	1	0	0	0	1
-	0/1	2/1	1	1	0	0	1	0
-	0/1	2/1	1	1	0	0	1	1
-	0/1	2/1	1	1	0	1	0	0
-	0/1	2/1	1	1	0	1	0	1
-	0/1	2/1	1	1	0	1	1	0
-	0/1	2/1	1	1	0	1	1	1
=	0/1	0/0	1	1	1	0	0	0
=	0/1	0/0	1	1	1	0	0	1
=	0/1	0/0	1	1	1	0	1	0
=	0/1	0/0	1	1	1	0	1	1
=	0/1	0/0	1	1	1	1	0	0
=	0/1	0/0	1	1	1	1	0	1
=	0/1	0/0	1	1	1	1	1	0
=	0/1	0/0	1	1	1	1	1	1
AKT -> Antisurvival is negative	Context
Sign	Source level	Target level	ERK	TAK1	p38alpha	PI3K	GSK3	betacatenin
-	0/1	2/1	0	0	0	0	0	0
-	0/1	2/1	0	0	0	0	0	1
-	0/1	2/1	0	0	0	0	1	0
-	0/1	2/1	0	0	0	0	1	1
-	0/1	2/1	0	0	0	1	0	0
-	0/1	2/1	0	0	0	1	0	1
-	0/1	2/1	0	0	0	1	1	0
-	0/1	2/1	0	0	0	1	1	1
-	0/1	2/0	0	0	1	0	0	0
-	0/1	2/0	0	0	1	0	0	1
-	0/1	2/0	0	0	1	0	1	0
-	0/1	2/0	0	0	1	0	1	1
-	0/1	3/0	0	0	1	1	0	0
-	0/1	3/0	0	0	1	1	0	1
-	0/1	3/0	0	0	1	1	1	0
-	0/1	3/0	0	0	1	1	1	1
=	0/1	1/1	0	1	0	0	0	0
=	0/1	1/1	0	1	0	0	0	1
=	0/1	1/1	0	1	0	0	1	0
=	0/1	1/1	0	1	0	0	1	1
=	0/1	1/1	0	1	0	1	0	0
=	0/1	1/1	0	1	0	1	0	1
=	0/1	1/1	0	1	0	1	1	0
=	0/1	1/1	0	1	0	1	1	1
-	0/1	1/0	0	1	1	0	0	0
-	0/1	1/0	0	1	1	0	0	1
-	0/1	1/0	0	1	1	0	1	0
-	0/1	1/0	0	1	1	0	1	1
-	0/1	1/0	0	1	1	1	0	0
-	0/1	2/0	0	1	1	1	0	1
-	0/1	2/0	0	1	1	1	1	0
-	0/1	2/0	0	1	1	1	1	1
-	0/1	2/0	1	0	0	0	0	0
-	0/1	2/0	1	0	0	0	0	1
-	0/1	2/0	1	0	0	0	1	0
-	0/1	2/0	1	0	0	0	1	1
-	0/1	2/0	1	0	0	1	0	0
-	0/1	2/0	1	0	0	1	0	1
-	0/1	2/0	1	0	0	1	1	0
-	0/1	2/0	1	0	0	1	1	1
-	0/1	2/0	1	0	1	0	0	0
-	0/1	2/0	1	0	1	0	0	1
-	0/1	2/0	1	0	1	0	1	0
-	0/1	2/0	1	0	1	0	1	1
-	0/1	2/0	1	0	1	1	0	0
-	0/1	2/0	1	0	1	1	0	1
-	0/1	2/0	1	0	1	1	1	0
-	0/1	2/0	1	0	1	1	1	1
-	0/1	1/0	1	1	0	0	0	0
-	0/1	1/0	1	1	0	0	0	1
-	0/1	1/0	1	1	0	0	1	0
-	0/1	1/0	1	1	0	0	1	1
-	0/1	1/0	1	1	0	1	0	0
-	0/1	1/0	1	1	0	1	0	1
-	0/1	1/0	1	1	0	1	1	0
-	0/1	1/0	1	1	0	1	1	1
-	0/1	1/0	1	1	1	0	0	0
-	0/1	1/0	1	1	1	0	0	1
-	0/1	1/0	1	1	1	0	1	0
-	0/1	1/0	1	1	1	0	1	1
-	0/1	1/0	1	1	1	1	0	0
-	0/1	1/0	1	1	1	1	0	1
-	0/1	1/0	1	1	1	1	1	0
-	0/1	1/0	1	1	1	1	1	1
GSK3 -> Antisurvival is positive	Context
Sign	Source level	Target level	ERK	TAK1	p38alpha	AKT	PI3K	betacatenin
=	0/1	2/2	0	0	0	0	0	0
=	0/1	2/2	0	0	0	0	0	1
=	0/1	2/2	0	0	0	0	1	0
=	0/1	2/2	0	0	0	0	1	1
=	0/1	1/1	0	0	0	1	0	0
=	0/1	1/1	0	0	0	1	0	1
=	0/1	1/1	0	0	0	1	1	0
=	0/1	1/1	0	0	0	1	1	1
=	0/1	2/2	0	0	1	0	0	0
=	0/1	2/2	0	0	1	0	0	1
=	0/1	3/3	0	0	1	0	1	0
=	0/1	3/3	0	0	1	0	1	1
=	0/1	0/0	0	0	1	1	0	0
=	0/1	0/0	0	0	1	1	0	1
=	0/1	0/0	0	0	1	1	1	0
=	0/1	0/0	0	0	1	1	1	1
=	0/1	1/1	0	1	0	0	0	0
=	0/1	1/1	0	1	0	0	0	1
=	0/1	1/1	0	1	0	0	1	0
=	0/1	1/1	0	1	0	0	1	1
=	0/1	1/1	0	1	0	1	0	0
=	0/1	1/1	0	1	0	1	0	1
=	0/1	1/1	0	1	0	1	1	0
=	0/1	1/1	0	1	0	1	1	1
=	0/1	1/1	0	1	1	0	0	0
=	0/1	1/1	0	1	1	0	0	1
+	0/1	1/2	0	1	1	0	1	0
=	0/1	2/2	0	1	1	0	1	1
=	0/1	0/0	0	1	1	1	0	0
=	0/1	0/0	0	1	1	1	0	1
=	0/1	0/0	0	1	1	1	1	0
=	0/1	0/0	0	1	1	1	1	1
=	0/1	2/2	1	0	0	0	0	0
=	0/1	2/2	1	0	0	0	0	1
=	0/1	2/2	1	0	0	0	1	0
=	0/1	2/2	1	0	0	0	1	1
=	0/1	0/0	1	0	0	1	0	0
=	0/1	0/0	1	0	0	1	0	1
=	0/1	0/0	1	0	0	1	1	0
=	0/1	0/0	1	0	0	1	1	1
=	0/1	2/2	1	0	1	0	0	0
=	0/1	2/2	1	0	1	0	0	1
=	0/1	2/2	1	0	1	0	1	0
=	0/1	2/2	1	0	1	0	1	1
=	0/1	0/0	1	0	1	1	0	0
=	0/1	0/0	1	0	1	1	0	1
=	0/1	0/0	1	0	1	1	1	0
=	0/1	0/0	1	0	1	1	1	1
=	0/1	1/1	1	1	0	0	0	0
=	0/1	1/1	1	1	0	0	0	1
=	0/1	1/1	1	1	0	0	1	0
=	0/1	1/1	1	1	0	0	1	1
=	0/1	0/0	1	1	0	1	0	0
=	0/1	0/0	1	1	0	1	0	1
=	0/1	0/0	1	1	0	1	1	0
=	0/1	0/0	1	1	0	1	1	1
=	0/1	1/1	1	1	1	0	0	0
=	0/1	1/1	1	1	1	0	0	1
=	0/1	1/1	1	1	1	0	1	0
=	0/1	1/1	1	1	1	0	1	1
=	0/1	0/0	1	1	1	1	0	0
=	0/1	0/0	1	1	1	1	0	1
=	0/1	0/0	1	1	1	1	1	0
=	0/1	0/0	1	1	1	1	1	1
Target node: AKT
betacatenin -> AKT is positive	Context
Sign	Source level	Target level	ERK	TAK1	AKT	PI3K	GSK3
=	0/1	0/0	0	0	0	0	0
=	0/1	1/1	0	0	0	0	1
=	0/1	1/1	0	0	0	1	0
=	0/1	1/1	0	0	0	1	1
=	0/1	0/0	0	0	1	0	0
=	0/1	0/0	0	0	1	0	1
=	0/1	1/1	0	0	1	1	0
=	0/1	1/1	0	0	1	1	1
=	0/1	0/0	0	1	0	0	0
=	0/1	0/0	0	1	0	0	1
+	0/1	0/1	0	1	0	1	0
=	0/1	1/1	0	1	0	1	1
=	0/1	0/0	0	1	1	0	0
=	0/1	0/0	0	1	1	0	1
+	0/1	0/1	0	1	1	1	0
=	0/1	1/1	0	1	1	1	1
=	0/1	0/0	1	0	0	0	0
=	0/1	0/0	1	0	0	0	1
=	0/1	1/1	1	0	0	1	0
=	0/1	1/1	1	0	0	1	1
=	0/1	0/0	1	0	1	0	0
=	0/1	0/0	1	0	1	0	1
=	0/1	1/1	1	0	1	1	0
=	0/1	1/1	1	0	1	1	1
=	0/1	0/0	1	1	0	0	0
=	0/1	0/0	1	1	0	0	1
+	0/1	0/1	1	1	0	1	0
=	0/1	1/1	1	1	0	1	1
=	0/1	0/0	1	1	1	0	0
=	0/1	0/0	1	1	1	0	1
+	0/1	0/1	1	1	1	1	0
=	0/1	1/1	1	1	1	1	1
PI3K -> AKT is positive	Context
Sign	Source level	Target level	ERK	TAK1	AKT	GSK3	betacatenin
+	0/1	0/1	0	0	0	0	0
+	0/1	0/1	0	0	0	0	1
=	0/1	1/1	0	0	0	1	0
=	0/1	1/1	0	0	0	1	1
+	0/1	0/1	0	0	1	0	0
+	0/1	0/1	0	0	1	0	1
+	0/1	0/1	0	0	1	1	0
+	0/1	0/1	0	0	1	1	1
=	0/1	0/0	0	1	0	0	0
+	0/1	0/1	0	1	0	0	1
+	0/1	0/1	0	1	0	1	0
+	0/1	0/1	0	1	0	1	1
=	0/1	0/0	0	1	1	0	0
+	0/1	0/1	0	1	1	0	1
+	0/1	0/1	0	1	1	1	0
+	0/1	0/1	0	1	1	1	1
+	0/1	0/1	1	0	0	0	0
+	0/1	0/1	1	0	0	0	1
+	0/1	0/1	1	0	0	1	0
+	0/1	0/1	1	0	0	1	1
+	0/1	0/1	1	0	1	0	0
+	0/1	0/1	1	0	1	0	1
+	0/1	0/1	1	0	1	1	0
+	0/1	0/1	1	0	1	1	1
=	0/1	0/0	1	1	0	0	0
+	0/1	0/1	1	1	0	0	1
+	0/1	0/1	1	1	0	1	0
+	0/1	0/1	1	1	0	1	1
=	0/1	0/0	1	1	1	0	0
+	0/1	0/1	1	1	1	0	1
+	0/1	0/1	1	1	1	1	0
+	0/1	0/1	1	1	1	1	1
ERK -> AKT is negative	Context
Sign	Source level	Target level	TAK1	AKT	PI3K	GSK3	betacatenin
=	0/1	0/0	0	0	0	0	0
=	0/1	0/0	0	0	0	0	1
-	0/1	1/0	0	0	0	1	0
-	0/1	1/0	0	0	0	1	1
=	0/1	1/1	0	0	1	0	0
=	0/1	1/1	0	0	1	0	1
=	0/1	1/1	0	0	1	1	0
=	0/1	1/1	0	0	1	1	1
=	0/1	0/0	0	1	0	0	0
=	0/1	0/0	0	1	0	0	1
=	0/1	0/0	0	1	0	1	0
=	0/1	0/0	0	1	0	1	1
=	0/1	1/1	0	1	1	0	0
=	0/1	1/1	0	1	1	0	1
=	0/1	1/1	0	1	1	1	0
=	0/1	1/1	0	1	1	1	1
=	0/1	0/0	1	0	0	0	0
=	0/1	0/0	1	0	0	0	1
=	0/1	0/0	1	0	0	1	0
=	0/1	0/0	1	0	0	1	1
=	0/1	0/0	1	0	1	0	0
=	0/1	1/1	1	0	1	0	1
=	0/1	1/1	1	0	1	1	0
=	0/1	1/1	1	0	1	1	1
=	0/1	0/0	1	1	0	0	0
=	0/1	0/0	1	1	0	0	1
=	0/1	0/0	1	1	0	1	0
=	0/1	0/0	1	1	0	1	1
=	0/1	0/0	1	1	1	0	0
=	0/1	1/1	1	1	1	0	1
=	0/1	1/1	1	1	1	1	0
=	0/1	1/1	1	1	1	1	1
TAK1 -> AKT is negative	Context
Sign	Source level	Target level	ERK	AKT	PI3K	GSK3	betacatenin
=	0/1	0/0	0	0	0	0	0
=	0/1	0/0	0	0	0	0	1
-	0/1	1/0	0	0	0	1	0
-	0/1	1/0	0	0	0	1	1
-	0/1	1/0	0	0	1	0	0
=	0/1	1/1	0	0	1	0	1
=	0/1	1/1	0	0	1	1	0
=	0/1	1/1	0	0	1	1	1
=	0/1	0/0	0	1	0	0	0
=	0/1	0/0	0	1	0	0	1
=	0/1	0/0	0	1	0	1	0
=	0/1	0/0	0	1	0	1	1
-	0/1	1/0	0	1	1	0	0
=	0/1	1/1	0	1	1	0	1
=	0/1	1/1	0	1	1	1	0
=	0/1	1/1	0	1	1	1	1
=	0/1	0/0	1	0	0	0	0
=	0/1	0/0	1	0	0	0	1
=	0/1	0/0	1	0	0	1	0
=	0/1	0/0	1	0	0	1	1
-	0/1	1/0	1	0	1	0	0
=	0/1	1/1	1	0	1	0	1
=	0/1	1/1	1	0	1	1	0
=	0/1	1/1	1	0	1	1	1
=	0/1	0/0	1	1	0	0	0
=	0/1	0/0	1	1	0	0	1
=	0/1	0/0	1	1	0	1	0
=	0/1	0/0	1	1	0	1	1
-	0/1	1/0	1	1	1	0	0
=	0/1	1/1	1	1	1	0	1
=	0/1	1/1	1	1	1	1	0
=	0/1	1/1	1	1	1	1	1
AKT -> AKT is negative	Context
Sign	Source level	Target level	ERK	TAK1	PI3K	GSK3	betacatenin
=	0/1	0/0	0	0	0	0	0
=	0/1	0/0	0	0	0	0	1
-	0/1	1/0	0	0	0	1	0
-	0/1	1/0	0	0	0	1	1
=	0/1	1/1	0	0	1	0	0
=	0/1	1/1	0	0	1	0	1
=	0/1	1/1	0	0	1	1	0
=	0/1	1/1	0	0	1	1	1
=	0/1	0/0	0	1	0	0	0
=	0/1	0/0	0	1	0	0	1
=	0/1	0/0	0	1	0	1	0
=	0/1	0/0	0	1	0	1	1
=	0/1	0/0	0	1	1	0	0
=	0/1	1/1	0	1	1	0	1
=	0/1	1/1	0	1	1	1	0
=	0/1	1/1	0	1	1	1	1
=	0/1	0/0	1	0	0	0	0
=	0/1	0/0	1	0	0	0	1
=	0/1	0/0	1	0	0	1	0
=	0/1	0/0	1	0	0	1	1
=	0/1	1/1	1	0	1	0	0
=	0/1	1/1	1	0	1	0	1
=	0/1	1/1	1	0	1	1	0
=	0/1	1/1	1	0	1	1	1
=	0/1	0/0	1	1	0	0	0
=	0/1	0/0	1	1	0	0	1
=	0/1	0/0	1	1	0	1	0
=	0/1	0/0	1	1	0	1	1
=	0/1	0/0	1	1	1	0	0
=	0/1	1/1	1	1	1	0	1
=	0/1	1/1	1	1	1	1	0
=	0/1	1/1	1	1	1	1	1
GSK3 -> AKT is positive	Context
Sign	Source level	Target level	ERK	TAK1	AKT	PI3K	betacatenin
+	0/1	0/1	0	0	0	0	0
+	0/1	0/1	0	0	0	0	1
=	0/1	1/1	0	0	0	1	0
=	0/1	1/1	0	0	0	1	1
=	0/1	0/0	0	0	1	0	0
=	0/1	0/0	0	0	1	0	1
=	0/1	1/1	0	0	1	1	0
=	0/1	1/1	0	0	1	1	1
=	0/1	0/0	0	1	0	0	0
=	0/1	0/0	0	1	0	0	1
+	0/1	0/1	0	1	0	1	0
=	0/1	1/1	0	1	0	1	1
=	0/1	0/0	0	1	1	0	0
=	0/1	0/0	0	1	1	0	1
+	0/1	0/1	0	1	1	1	0
=	0/1	1/1	0	1	1	1	1
=	0/1	0/0	1	0	0	0	0
=	0/1	0/0	1	0	0	0	1
=	0/1	1/1	1	0	0	1	0
=	0/1	1/1	1	0	0	1	1
=	0/1	0/0	1	0	1	0	0
=	0/1	0/0	1	0	1	0	1
=	0/1	1/1	1	0	1	1	0
=	0/1	1/1	1	0	1	1	1
=	0/1	0/0	1	1	0	0	0
=	0/1	0/0	1	1	0	0	1
+	0/1	0/1	1	1	0	1	0
=	0/1	1/1	1	1	0	1	1
=	0/1	0/0	1	1	1	0	0
=	0/1	0/0	1	1	1	0	1
+	0/1	0/1	1	1	1	1	0
=	0/1	1/1	1	1	1	1	1
Target node: PI3K
betacatenin -> PI3K is positive	Context
Sign	Source level	Target level	ERK	TAK1	GSK3
=	0/1	1/1	0	0	0
=	0/1	1/1	0	0	1
=	0/1	1/1	0	1	0
=	0/1	1/1	0	1	1
=	0/1	1/1	1	0	0
=	0/1	1/1	1	0	1
+	0/1	0/1	1	1	0
=	0/1	1/1	1	1	1
ERK -> PI3K is negative	Context
Sign	Source level	Target level	TAK1	GSK3	betacatenin
=	0/1	1/1	0	0	0
=	0/1	1/1	0	0	1
=	0/1	1/1	0	1	0
=	0/1	1/1	0	1	1
-	0/1	1/0	1	0	0
=	0/1	1/1	1	0	1
=	0/1	1/1	1	1	0
=	0/1	1/1	1	1	1
TAK1 -> PI3K is negative	Context
Sign	Source level	Target level	ERK	GSK3	betacatenin
=	0/1	1/1	0	0	0
=	0/1	1/1	0	0	1
=	0/1	1/1	0	1	0
=	0/1	1/1	0	1	1
-	0/1	1/0	1	0	0
=	0/1	1/1	1	0	1
=	0/1	1/1	1	1	0
=	0/1	1/1	1	1	1
GSK3 -> PI3K is positive	Context
Sign	Source level	Target level	ERK	TAK1	betacatenin
=	0/1	1/1	0	0	0
=	0/1	1/1	0	0	1
=	0/1	1/1	0	1	0
=	0/1	1/1	0	1	1
=	0/1	1/1	1	0	0
=	0/1	1/1	1	0	1
+	0/1	0/1	1	1	0
=	0/1	1/1	1	1	1
Target node: TAK1
p38alpha -> TAK1 is negative
Sign	Source level	Target level
-	0/1	1/0
Target node: MEK
betacatenin -> MEK is positive	Context
Sign	Source level	Target level	ERK	TAK1	p38alpha	AKT	GSK3
=	0/1	1/1	0	0	0	0	0
=	0/1	1/1	0	0	0	0	1
=	0/1	1/1	0	0	0	1	0
=	0/1	1/1	0	0	0	1	1
=	0/1	1/1	0	0	1	0	0
=	0/1	1/1	0	0	1	0	1
=	0/1	1/1	0	0	1	1	0
=	0/1	1/1	0	0	1	1	1
=	0/1	1/1	0	1	0	0	0
=	0/1	1/1	0	1	0	0	1
=	0/1	1/1	0	1	0	1	0
=	0/1	1/1	0	1	0	1	1
=	0/1	1/1	0	1	1	0	0
=	0/1	1/1	0	1	1	0	1
=	0/1	1/1	0	1	1	1	0
=	0/1	1/1	0	1	1	1	1
=	0/1	1/1	1	0	0	0	0
=	0/1	1/1	1	0	0	0	1
=	0/1	1/1	1	0	0	1	0
=	0/1	1/1	1	0	0	1	1
=	0/1	1/1	1	0	1	0	0
=	0/1	1/1	1	0	1	0	1
=	0/1	1/1	1	0	1	1	0
=	0/1	1/1	1	0	1	1	1
=	0/1	1/1	1	1	0	0	0
=	0/1	1/1	1	1	0	0	1
=	0/1	1/1	1	1	0	1	0
=	0/1	1/1	1	1	0	1	1
=	0/1	1/1	1	1	1	0	0
=	0/1	1/1	1	1	1	0	1
+	0/1	0/1	1	1	1	1	0
=	0/1	1/1	1	1	1	1	1
ERK -> MEK is negative	Context
Sign	Source level	Target level	TAK1	p38alpha	AKT	GSK3	betacatenin
=	0/1	1/1	0	0	0	0	0
=	0/1	1/1	0	0	0	0	1
=	0/1	1/1	0	0	0	1	0
=	0/1	1/1	0	0	0	1	1
=	0/1	1/1	0	0	1	0	0
=	0/1	1/1	0	0	1	0	1
=	0/1	1/1	0	0	1	1	0
=	0/1	1/1	0	0	1	1	1
=	0/1	1/1	0	1	0	0	0
=	0/1	1/1	0	1	0	0	1
=	0/1	1/1	0	1	0	1	0
=	0/1	1/1	0	1	0	1	1
=	0/1	1/1	0	1	1	0	0
=	0/1	1/1	0	1	1	0	1
=	0/1	1/1	0	1	1	1	0
=	0/1	1/1	0	1	1	1	1
=	0/1	1/1	1	0	0	0	0
=	0/1	1/1	1	0	0	0	1
=	0/1	1/1	1	0	0	1	0
=	0/1	1/1	1	0	0	1	1
=	0/1	1/1	1	0	1	0	0
=	0/1	1/1	1	0	1	0	1
=	0/1	1/1	1	0	1	1	0
=	0/1	1/1	1	0	1	1	1
=	0/1	1/1	1	1	0	0	0
=	0/1	1/1	1	1	0	0	1
=	0/1	1/1	1	1	0	1	0
=	0/1	1/1	1	1	0	1	1
-	0/1	1/0	1	1	1	0	0
=	0/1	1/1	1	1	1	0	1
=	0/1	1/1	1	1	1	1	0
=	0/1	1/1	1	1	1	1	1
p38alpha -> MEK is negative	Context
Sign	Source level	Target level	ERK	TAK1	AKT	GSK3	betacatenin
=	0/1	1/1	0	0	0	0	0
=	0/1	1/1	0	0	0	0	1
=	0/1	1/1	0	0	0	1	0
=	0/1	1/1	0	0	0	1	1
=	0/1	1/1	0	0	1	0	0
=	0/1	1/1	0	0	1	0	1
=	0/1	1/1	0	0	1	1	0
=	0/1	1/1	0	0	1	1	1
=	0/1	1/1	0	1	0	0	0
=	0/1	1/1	0	1	0	0	1
=	0/1	1/1	0	1	0	1	0
=	0/1	1/1	0	1	0	1	1
=	0/1	1/1	0	1	1	0	0
=	0/1	1/1	0	1	1	0	1
=	0/1	1/1	0	1	1	1	0
=	0/1	1/1	0	1	1	1	1
=	0/1	1/1	1	0	0	0	0
=	0/1	1/1	1	0	0	0	1
=	0/1	1/1	1	0	0	1	0
=	0/1	1/1	1	0	0	1	1
=	0/1	1/1	1	0	1	0	0
=	0/1	1/1	1	0	1	0	1
=	0/1	1/1	1	0	1	1	0
=	0/1	1/1	1	0	1	1	1
=	0/1	1/1	1	1	0	0	0
=	0/1	1/1	1	1	0	0	1
=	0/1	1/1	1	1	0	1	0
=	0/1	1/1	1	1	0	1	1
-	0/1	1/0	1	1	1	0	0
=	0/1	1/1	1	1	1	0	1
=	0/1	1/1	1	1	1	1	0
=	0/1	1/1	1	1	1	1	1
TAK1 -> MEK is negative	Context
Sign	Source level	Target level	ERK	p38alpha	AKT	GSK3	betacatenin
=	0/1	1/1	0	0	0	0	0
=	0/1	1/1	0	0	0	0	1
=	0/1	1/1	0	0	0	1	0
=	0/1	1/1	0	0	0	1	1
=	0/1	1/1	0	0	1	0	0
=	0/1	1/1	0	0	1	0	1
=	0/1	1/1	0	0	1	1	0
=	0/1	1/1	0	0	1	1	1
=	0/1	1/1	0	1	0	0	0
=	0/1	1/1	0	1	0	0	1
=	0/1	1/1	0	1	0	1	0
=	0/1	1/1	0	1	0	1	1
=	0/1	1/1	0	1	1	0	0
=	0/1	1/1	0	1	1	0	1
=	0/1	1/1	0	1	1	1	0
=	0/1	1/1	0	1	1	1	1
=	0/1	1/1	1	0	0	0	0
=	0/1	1/1	1	0	0	0	1
=	0/1	1/1	1	0	0	1	0
=	0/1	1/1	1	0	0	1	1
=	0/1	1/1	1	0	1	0	0
=	0/1	1/1	1	0	1	0	1
=	0/1	1/1	1	0	1	1	0
=	0/1	1/1	1	0	1	1	1
=	0/1	1/1	1	1	0	0	0
=	0/1	1/1	1	1	0	0	1
=	0/1	1/1	1	1	0	1	0
=	0/1	1/1	1	1	0	1	1
-	0/1	1/0	1	1	1	0	0
=	0/1	1/1	1	1	1	0	1
=	0/1	1/1	1	1	1	1	0
=	0/1	1/1	1	1	1	1	1
AKT -> MEK is negative	Context
Sign	Source level	Target level	ERK	TAK1	p38alpha	GSK3	betacatenin
=	0/1	1/1	0	0	0	0	0
=	0/1	1/1	0	0	0	0	1
=	0/1	1/1	0	0	0	1	0
=	0/1	1/1	0	0	0	1	1
=	0/1	1/1	0	0	1	0	0
=	0/1	1/1	0	0	1	0	1
=	0/1	1/1	0	0	1	1	0
=	0/1	1/1	0	0	1	1	1
=	0/1	1/1	0	1	0	0	0
=	0/1	1/1	0	1	0	0	1
=	0/1	1/1	0	1	0	1	0
=	0/1	1/1	0	1	0	1	1
=	0/1	1/1	0	1	1	0	0
=	0/1	1/1	0	1	1	0	1
=	0/1	1/1	0	1	1	1	0
=	0/1	1/1	0	1	1	1	1
=	0/1	1/1	1	0	0	0	0
=	0/1	1/1	1	0	0	0	1
=	0/1	1/1	1	0	0	1	0
=	0/1	1/1	1	0	0	1	1
=	0/1	1/1	1	0	1	0	0
=	0/1	1/1	1	0	1	0	1
=	0/1	1/1	1	0	1	1	0
=	0/1	1/1	1	0	1	1	1
=	0/1	1/1	1	1	0	0	0
=	0/1	1/1	1	1	0	0	1
=	0/1	1/1	1	1	0	1	0
=	0/1	1/1	1	1	0	1	1
-	0/1	1/0	1	1	1	0	0
=	0/1	1/1	1	1	1	0	1
=	0/1	1/1	1	1	1	1	0
=	0/1	1/1	1	1	1	1	1
GSK3 -> MEK is positive	Context
Sign	Source level	Target level	ERK	TAK1	p38alpha	AKT	betacatenin
=	0/1	1/1	0	0	0	0	0
=	0/1	1/1	0	0	0	0	1
=	0/1	1/1	0	0	0	1	0
=	0/1	1/1	0	0	0	1	1
=	0/1	1/1	0	0	1	0	0
=	0/1	1/1	0	0	1	0	1
=	0/1	1/1	0	0	1	1	0
=	0/1	1/1	0	0	1	1	1
=	0/1	1/1	0	1	0	0	0
=	0/1	1/1	0	1	0	0	1
=	0/1	1/1	0	1	0	1	0
=	0/1	1/1	0	1	0	1	1
=	0/1	1/1	0	1	1	0	0
=	0/1	1/1	0	1	1	0	1
=	0/1	1/1	0	1	1	1	0
=	0/1	1/1	0	1	1	1	1
=	0/1	1/1	1	0	0	0	0
=	0/1	1/1	1	0	0	0	1
=	0/1	1/1	1	0	0	1	0
=	0/1	1/1	1	0	0	1	1
=	0/1	1/1	1	0	1	0	0
=	0/1	1/1	1	0	1	0	1
=	0/1	1/1	1	0	1	1	0
=	0/1	1/1	1	0	1	1	1
=	0/1	1/1	1	1	0	0	0
=	0/1	1/1	1	1	0	0	1
=	0/1	1/1	1	1	0	1	0
=	0/1	1/1	1	1	0	1	1
=	0/1	1/1	1	1	1	0	0
=	0/1	1/1	1	1	1	0	1
+	0/1	0/1	1	1	1	1	0
=	0/1	1/1	1	1	1	1	1
